# Supplementary material for: A theoretical study of asymmetric electron transport through linearly aromatic molecules
Source: Royal Society of Chemistry journal article supplement (doi:10.1039/c4cp03887h), 2015-01-01
Supplement: c4cp03887h1.pdf [file c4cp03887h1.pdf]

## Supplementary Information

### Theoretical study of asymmetric electron transport through linearly aromatic molecules

Hongmei Liu,<sup>1</sup> Yuanyuan He,<sup>2</sup> Jinjiang Zhang,<sup>2</sup> Jianwei Zhao,<sup>2\*</sup> Li Chen<sup>1</sup>

<sup>1</sup>Institute of Condensed Matter Physics, Linyi University, Shuangling Road, Linyi 276000, P. R.  
China

<sup>2</sup>State Key Laboratory of Analytical Chemistry for Life Science, School of Chemistry and  
Chemical Engineering, Nanjing University, Nanjing 210008, P. R. China

---

\* To whom correspondence should be addressed. E-mail: [zhaojw@nju.edu.cn](mailto:zhaojw@nju.edu.cn)

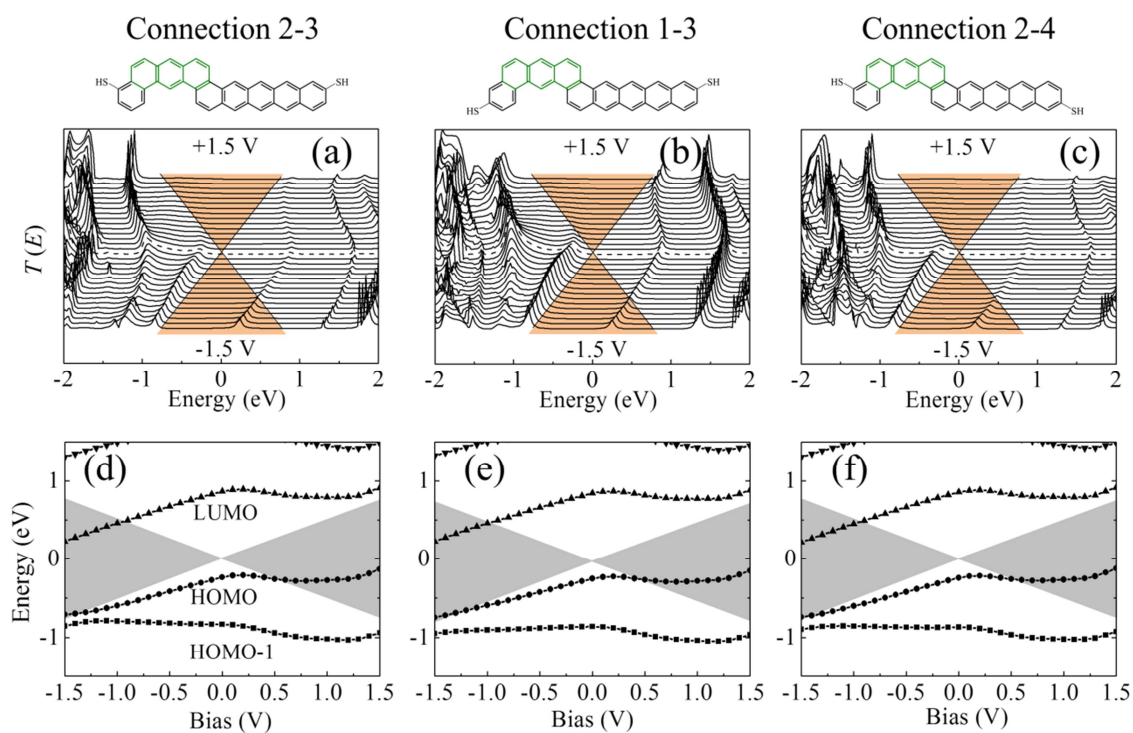

Figure S1. Transmission spectra of (a) connection 2-3, (b) 1-3, and (c) 2-4 under various biases (each curve is vertically shifted 0.1 for clarity). The shadow regions indicate the bias window and the dashed lines represent equilibrium transmission ( $V_b=0$  V). The bias-dependent molecular orbital energy levels of (d) connection 2-3, (e) 1-3, and (f) 2-4. The shadow regions correspond to the bias windows.
